# Supplementary material
Source: PubMed Central journal article supplement (PMC9115149)
Supplement: JSR-9999-0-s001.pdf [file JSR-9999-0-s001.pdf]

Supply figure 1 path analysis results for participants with missing data in COVID-19 related worries

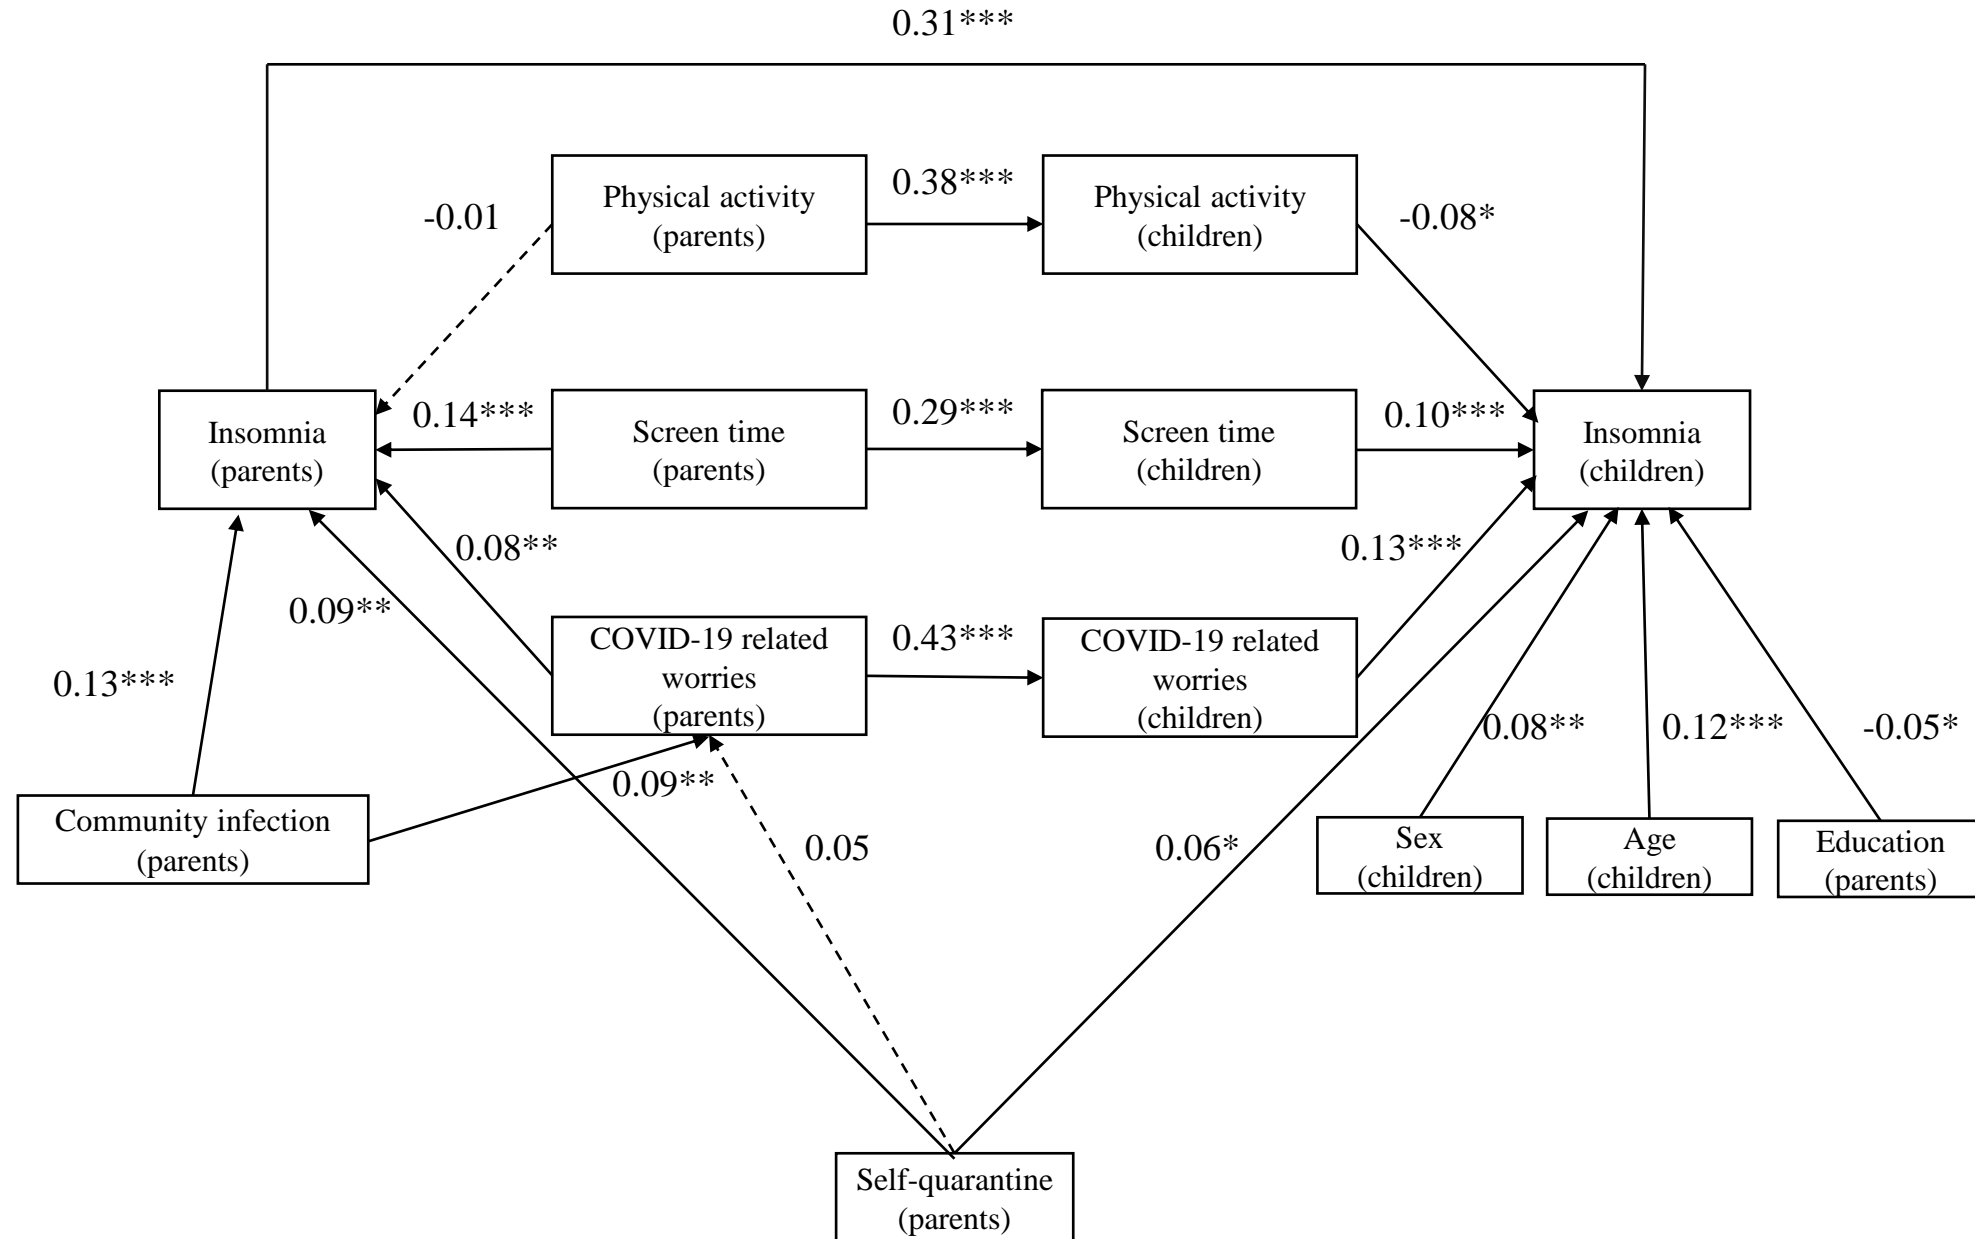

Note:  $\chi^2 = 70.374$ ,  $df = 39$ ,  $CFI = 0.964$ ,  $TLI = 0.947$ ,  $RMSEA (95\% CI) = 0.024 (0.015-0.033)$ ; \*,  $p < 0.05$ ; \*\*,  $p < 0.01$ ; \*\*\*,  $p < 0.001$ .
